# Supplementary material for: Canakinumab (ACZ885, a fully human IgG1 anti-IL-1β mAb) induces sustained remission in pediatric patients with cryopyrin-associated periodic syndrome (CAPS)
Source: Springer Nature journal article supplement (doi:10.1186/ar3266), 2011-02-01
Supplement: 13075_2010_9729_MOESM2_ESM.pdf [file 13075_2010_9729_MOESM2_ESM.pdf]

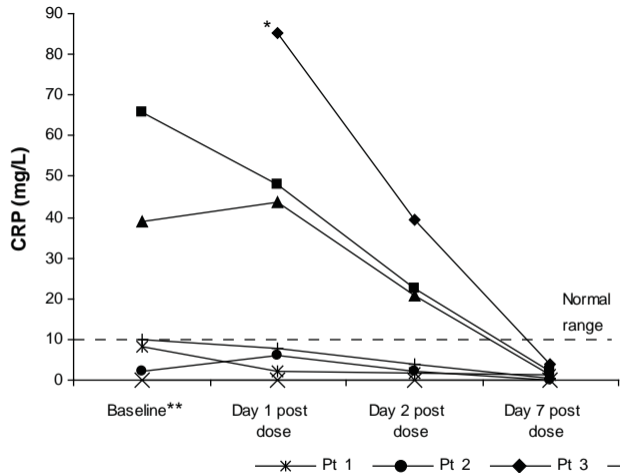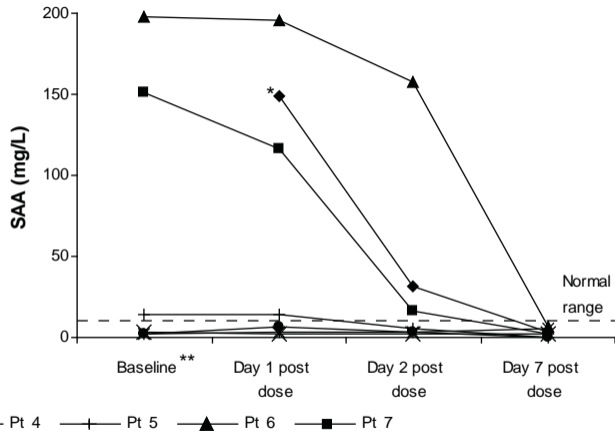

\* Baseline value not available

\*\* Baseline was measured in the period starting 3 days prior dose to pre-dose on the same day.
